# Supplementary material for: Metabolites of Siberian Raspberries: LC-MS Profile, Seasonal Variation, Antioxidant Activity and, Thermal Stability of Rubus matsumuranus Phenolome
Source: MDPI journal article supplement (doi:10.3390/plants10112317), 2021-10-27
Supplement: s1 [file s1]

Supplementary materials

# Metabolites of Siberian Raspberries: LC-MS Profile, Seasonal Variation, Antioxidant Activity and Thermal Stability of *Rubus matsumuranus* Phenolome

Nina I. Kashchenko<sup>1\*</sup>, Daniil N. Olennikov<sup>1</sup> and Nadezhda K. Chirikova<sup>2</sup>

<sup>1</sup> Laboratory of Medical and Biological Research, Institute of General and Experimental Biology, Siberian Division, Russian Academy of Science, 670047 Ulan-Ude, Russia; olennikovdn@mail.ru (D.N.O.)

<sup>2</sup> Department of Biology, Institute of Natural Sciences, North-Eastern Federal University, 677027 Yakutsk, Russia; hofnung@mail.ru (N.K.C.)

\* Correspondence: ninkk@mail.ru; Tel.: +7-9834-217-340

## Content

**Table S1.** Total phenolic content in solvents after various types of extraction of *Rubus matsumuranus* leaves,  $\mu\text{g/mL} \pm \text{S.D.}$

**Table S2.** Reference standards used for the qualitative and quantitative analysis by HPLC-PDA-ESI-QQQ-MS assay

**Table S3.** Regression equations, correlation coefficients ( $r^2$ ), standard deviation ( $S_{yx}$ ), limits of detection (LOD), limits of quantification (LOQ) and linear ranges for 25 reference standards.

**Table S1.** Total phenolic content in solvents after various types of extraction of *Rubus matsumuranus* leaves, µg/mL ± S.D.

| Parameter         | TPC         | Parameter              | TPC         |
|-------------------|-------------|------------------------|-------------|
| Solvent           |             | Solvent-material ratio |             |
| Methanol          | 2.25 ± 0.05 | 1 : 2                  | 1.67 ± 0.03 |
| Ethanol           | 2.11 ± 0.04 | 1 : 5                  | 1.98 ± 0.04 |
| Isopropanol       | 1.77 ± 0.04 | 1 : 10                 | 2.29 ± 0.05 |
| Water             | 1.12 ± 0.02 | 1 : 20                 | 2.27 ± 0.05 |
| Extraction type * |             | Temperature regime     |             |
| RTE               | 1.17 ± 0.02 | 10°C                   | 1.15 ± 0.02 |
| BWBE              | 1.96 ± 0.04 | 30°C                   | 1.33 ± 0.03 |
| MWAE              | 2.08 ± 0.05 | 50°C                   | 2.23 ± 0.04 |
| USE               | 2.30 ± 0.05 | 70°C                   | 2.17 ± 0.05 |
|                   |             | 90°C                   | 1.65 ± 0.03 |

\* Extraction type: RTE – room temperature extraction (20°C), BWBE – boiled water bath extraction (95°C), MWAE – micro-wave-assisted extraction (20°C), USE – ultrasound extraction (50°C). Total phenolic content was calculated as a sum of compounds **1–63** (Table 1) after HPLC quantification (Material and Methods, Section 3.3).

**Table S2.** Reference standards used for the qualitative and quantitative analysis by HPLC-PDA-ESI-QQQ-MS assay.

| No | Compound                    | Purity<br>(≥), % | Manufacturer (Cat. No.) * | Used for analysis (com-<br>pound No in Table 1) |
|----|-----------------------------|------------------|---------------------------|-------------------------------------------------|
| 2  | 1-O-Caffeoylquinic acid     | 98               | ChemFaces (CFN99121)      | 2                                               |
| 4  | Gallic acid                 | 98               | Sigma (PHL89198)          | 4                                               |
| 5  | Glucogallin                 | 90               | Sigma (PHL83250)          | 1, 5, 7                                         |
| 6  | Pedunculagin                | 95               | Toronto (P354070)         | 6, 25, 26, 27, 29, 30, 33                       |
| 8  | Gallocatechin               | 97               | Sigma (01388)             | 8                                               |
| 9  | Procyanidin B <sub>1</sub>  | 90               | Sigma (19542)             | 9                                               |
| 10 | Catechin                    | 99               | Sigma (43412)             | 10                                              |
| 11 | Procyanidin B <sub>2</sub>  | 90               | Sigma (42157)             | 11                                              |
| 12 | Epicatechin                 | 97               | Sigma (68097)             | 12                                              |
| 13 | 3-O-Caffeoylquinic acid     | 95               | Sigma (PHL89175)          | 13                                              |
| 16 | 1,6-Di-O-galloyl-glucose    | 92               | Toronto (D293195)         | 16                                              |
| 17 | 5-O-Caffeoylquinic acid     | 95               | Sigma (91213)             | 17                                              |
| 18 | 4-O-Caffeoylquinic acid     | 98               | Sigma (65969)             | 18                                              |
| 19 | 5-O-Feruloylquinic acid     | 98               | ChemFaces (CFN92889)      | 19                                              |
| 23 | 1,3,6-Tri-O-galloyl-glucose | 98               | Sigma (78864)             | 23, 24                                          |
| 31 | Catechin O-gallate          | 98               | Sigma (C0692)             | 31                                              |
| 37 | Ellagic acid                | 98               | Sigma (PHL89653)          | 32, 34, 35, 36, 37, 54, 55, 61,<br>62, 63       |
| 38 | Quercetin-3-O-rutinoside    | 95               | Sigma (PHL89270)          | 38                                              |
| 39 | Quercetin-3-O-glucoside     | 95               | Sigma (00140585)          | 39                                              |
| 40 | Quercetin-3-O-glucuronide   | 90               | Sigma (90733)             | 40, 42, 44, 46, 47, 50, 52, 56,<br>57, 58       |
| 41 | Kaempferol-3-O-glucuronide  | 97               | Sigma (79273)             | 41, 43, 45, 48, 49, 51, 53, 59,<br>60           |
|    | Coumalic acid               | 97               | Sigma (C85409)            | 3                                               |
|    | Caffeic acid                | 98               | Sigma (C0625)             | 14                                              |
|    | Agrimoniin                  | 98               | ALB (82203-01-8)          | 22                                              |
|    | Corilagin                   | 98               | Sigma (G0424)             | 15, 20, 21, 28                                  |

\* Manufacturers list: ALB (ALB Technology Limited, Mongkok Kowloon HongKong); ChemFaces (Wuhan, Hubei, PRC); Sigma-Aldrich (St. Louis, MO, USA); Toronto (Toronto Research Chemicals, North York, ON, Canada);

**Table S3.** Regression equations, correlation coefficients ( $r^2$ ), standard deviation ( $S_{yx}$ ), limits of detection (LOD), limits of quantification (LOQ) and linear ranges for 25 reference standards.

| Compound                             | Ionization<br><sup>a</sup> | CE <sup>b</sup><br>(eV) | Regression equation <sup>c</sup> |                | $r^2$  | $S_{yx}$              | LOD/LOQ<br>( $\mu\text{g/mL}$ ) | Linear<br>range<br>( $\mu\text{g/mL}$ ) |
|--------------------------------------|----------------------------|-------------------------|----------------------------------|----------------|--------|-----------------------|---------------------------------|-----------------------------------------|
|                                      |                            |                         | $a$                              | $b \cdot 10^6$ |        |                       |                                 |                                         |
| 1- <i>O</i> -Caffeoylquinic acid     | N                          | -15                     | 2.5394                           | -1.2360        | 0.9994 | $0.45 \cdot 10^{-2}$  | 0.006/0.02                      | 0.02–300.0                              |
| Gallic acid                          | N                          | -20                     | 2.6538                           | -0.1376        | 0.9990 | $1.17 \cdot 10^{-2}$  | 0.01/0.04                       | 0.1–100.0                               |
| Glucogallin                          | N                          | -20                     | 1.3586                           | -0.0663        | 0.9987 | $9.69 \cdot 10^{-2}$  | 0.24/0.71                       | 0.8–100.0                               |
| Pedunculagin                         | N                          | -35                     | 0.6370                           | -0.4521        | 0.9872 | $6.11 \cdot 10^{-2}$  | 0.32/0.96                       | 1.0–100.0                               |
| Gallocatechin                        | N                          | -35                     | 1.1495                           | -0.2110        | 0.9982 | $17.02 \cdot 10^{-2}$ | 0.48/1.48                       | 1.5–100.0                               |
| Procyanidin B <sub>1</sub>           | N                          | -30                     | 1.3722                           | -0.0829        | 0.9973 | $9.93 \cdot 10^{-2}$  | 0.24/0.72                       | 0.80–100.0                              |
| Catechin                             | N                          | -35                     | 0.9562                           | -0.0521        | 0.9971 | $7.79 \cdot 10^{-2}$  | 0.27/0.82                       | 0.9–100.0                               |
| Procyanidin B <sub>2</sub>           | N                          | -25                     | 1.3620                           | -0.0820        | 0.9961 | $9.91 \cdot 10^{-2}$  | 0.21/0.72                       | 0.8–100.0                               |
| Epicatechin                          | N                          | -35                     | 1.0828                           | -0.0456        | 0.9973 | $6.85 \cdot 10^{-2}$  | 0.21/0.63                       | 0.7–100.0                               |
| 3- <i>O</i> -Caffeoylquinic acid     | N                          | -15                     | 0.9320                           | -0.0523        | 0.9991 | $4.14 \cdot 10^{-2}$  | 0.15/0.44                       | 0.5–100.0                               |
| 1,6-Di- <i>O</i> -galloyl-glucose    | N                          | -20                     | 1.7552                           | -0.0569        | 0.9982 | $8.89 \cdot 10^{-2}$  | 0.18/0.51                       | 0.6–100.0                               |
| 5- <i>O</i> -Caffeoylquinic acid     | N                          | -15                     | 0.9406                           | -0.0497        | 0.9973 | $5.18 \cdot 10^{-2}$  | 0.18/0.55                       | 0.6–100.0                               |
| 4- <i>O</i> -Caffeoylquinic acid     | N                          | -15                     | 0.9217                           | -0.0437        | 0.9982 | $3.94 \cdot 10^{-2}$  | 0.14/0.43                       | 0.5–100.0                               |
| 5- <i>O</i> -Feruloylquinic acid     | N                          | -20                     | 1.8535                           | 0.0761         | 0.9989 | $4.55 \cdot 10^{-2}$  | 0.08/0.25                       | 0.3–100.0                               |
| 1,3,6-Tri- <i>O</i> -galloyl-glucose | N                          | -25                     | 2.1064                           | -0.0499        | 0.9985 | $8.74 \cdot 10^{-2}$  | 0.14/0.42                       | 0.5–100.0                               |
| Catechin <i>O</i> -gallate           | N                          | -35                     | 1.3387                           | -0.0284        | 0.9981 | $9.50 \cdot 10^{-2}$  | 0.23/0.71                       | 0.8–100.0                               |
| Ellagic acid                         | N                          | -30                     | 0.9114                           | -0.6312        | 0.9887 | $6.37 \cdot 10^{-2}$  | 0.23/0.70                       | 0.7–100.0                               |
| Quercetin-3- <i>O</i> -rutinoside    | N                          | -25                     | 1.2716                           | -0.7389        | 0.9897 | $9.14 \cdot 10^{-2}$  | 0.23/0.72                       | 0.8–100.0                               |
| Quercetin-3- <i>O</i> -glucoside     | N                          | -20                     | 1.8267                           | -0.4160        | 0.9990 | $11.73 \cdot 10^{-2}$ | 0.21/0.67                       | 0.7–100.0                               |
| Quercetin-3- <i>O</i> -glucuronide   | N                          | -20                     | 1.6705                           | -0.4374        | 0.9988 | $12.79 \cdot 10^{-2}$ | 0.25/0.77                       | 0.8–100.0                               |
| Kaempferol-3- <i>O</i> -glucuronide  | N                          | -30                     | 2.2126                           | -0.5160        | 0.9987 | $8.11 \cdot 10^{-2}$  | 0.12/0.37                       | 0.4–100.0                               |
| Coumalic acid                        | N                          | -20                     | 0.8115                           | -0.1006        | 0.9980 | $2.25 \cdot 10^{-2}$  | 0.10/0.28                       | 0.3–100.0                               |
| Caffeic acid                         | N                          | -20                     | 2.4493                           | -0.0938        | 0.9989 | $1.85 \cdot 10^{-2}$  | 0.03/0.08                       | 0.1–100.0                               |
| Agrimoniin                           | N                          | -35                     | 0.8214                           | -0.2716        | 0.9893 | $5.37 \cdot 10^{-2}$  | 0.22/0.65                       | 0.7–100.0                               |
| Corilagin                            | N                          | -35                     | 0.9361                           | -0.4518        | 0.9870 | $9.35 \cdot 10^{-2}$  | 0.32/1.00                       | 1.0–100.0                               |

<sup>a</sup> Ionization mode: N – negative. <sup>b</sup> CE – collision energy. <sup>c</sup> Regression equation:  $y = a \cdot x + b$
